# Supplementary material for: Silver-integrated cobalt hydroxide hybrid nanostructured materials for improved electrocatalytic oxygen evolution reaction
Source: Royal Society of Chemistry journal article supplement (doi:10.1039/d3nj05268k), 2023-12-21
Supplement: d3nj05268k1.pdf [file d3nj05268k1.pdf]

## Silver integrated cobalt hydroxide hybrid nanostructured materials for improved electrocatalytic oxygen evolution reaction

Gunasekaran Arunkumar,<sup>a</sup> Pandi Muthukumar,<sup>b</sup> Govindan Deviga,<sup>c</sup> Mariappan Mariappan,<sup>c</sup> Mehboobali Pannipara,<sup>d,e</sup> Abdullah G. Al-Sehemi<sup>d,e</sup> and Savarimuthu Philip Anthony<sup>a\*</sup>

<sup>a</sup>)Department of Chemistry, School of Chemical & Biotechnology, SASTRA Deemed University, Thanjavur-613401, Tamil Nadu, India. E-mail: [philip@biotech.sastra.edu](mailto:philip@biotech.sastra.edu).

<sup>b</sup>)Department of Chemistry, Saveetha School of Engineering, Saveetha Institute of Medical and Technical Sciences, Saveetha University, Chennai – 600077, Tamil Nadu, India

<sup>c</sup>)Department of Chemistry, SRM IST, Kattankulathur, Chennai-603203, Tamil Nadu, India.

<sup>d</sup>)Research center for Advanced Materials Science, King Khalid University, Abha 61413, Saudi Arabia.

<sup>e</sup>)Department of Chemistry, King Khalid University, Abha 61413, Saudi Arabia.

### Electrochemical measurements and calculation

The polarization curve was obtained using linear sweep voltammetry at 1 mV between 0 to 0.8 vs SCE. The CV was carried at 50 mV between 0 to 0.8 to obtain a steady state of catalysts. EIS was taken at a potential where it reaches 10 mA/cm<sup>2</sup> current density between 1 to 10<sup>6</sup> HZ.

### Turnover Frequency was calculated at 300mV over the potential

#### Stepwise calculation

Step 1. At constant potential ( $\eta=300\text{mV}$ ) how much current density is produced by different catalysts? ( Where production current is an indirect function of oxygen production).

Step 2

$$TOF = \frac{jA}{4Fm}$$

J – current density mAcm<sup>-2</sup>, A- Area of working electrode n cm<sup>2</sup>, F – Faraday constant (96485 F), m – moles of metal.

Step 3

All the catalyst loading was approximately 0.2mg on a 0.1 cm<sup>2</sup> surface area. Assume that only cobalt is present in the material. So, a mole of Cobalt is  $3.3938 \times 10^{-6}$ .

Step 4

By using the above formula and data we calculated TOF for all the materials.

### **ECSA – Electrochemical surface area:**

ECSA is the indirect analysis to calculate number of active sites present in the catalytic surface. The ECSA =  $C_{dl}/C_s$ .  $C_{dl}$  (double layer capacitance) is calculated by cyclic Voltammetry

varying the scan rate at Non faradic region of the catalyst (0.1 to 0.3 vs SCE).  $C_s$  is the specific capacitance of the smooth metal surface ( $\approx 0.04\text{mF cm}^{-2}$  for 1M KOH solution).

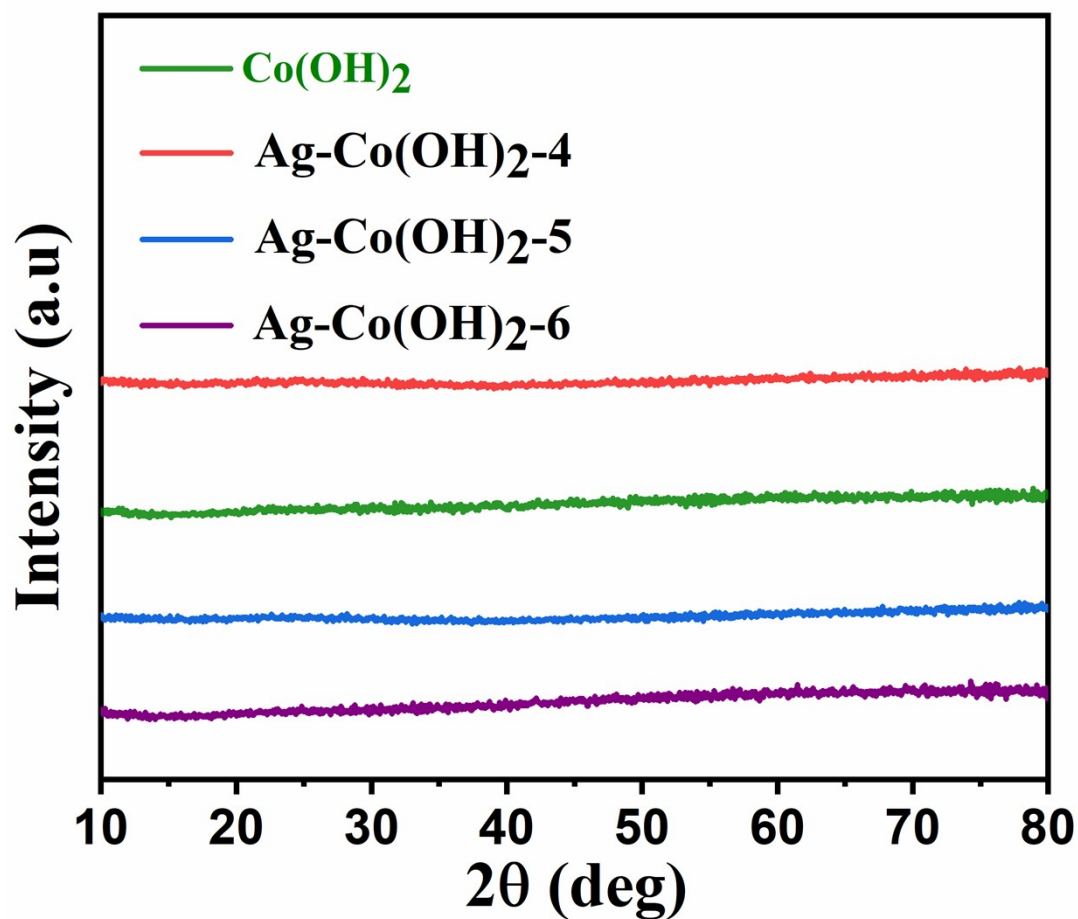

Figure S1. PXRD of  $\text{Co(OH)}_2$  and AgNPs integrated  $\text{Co(OH)}_2$ .

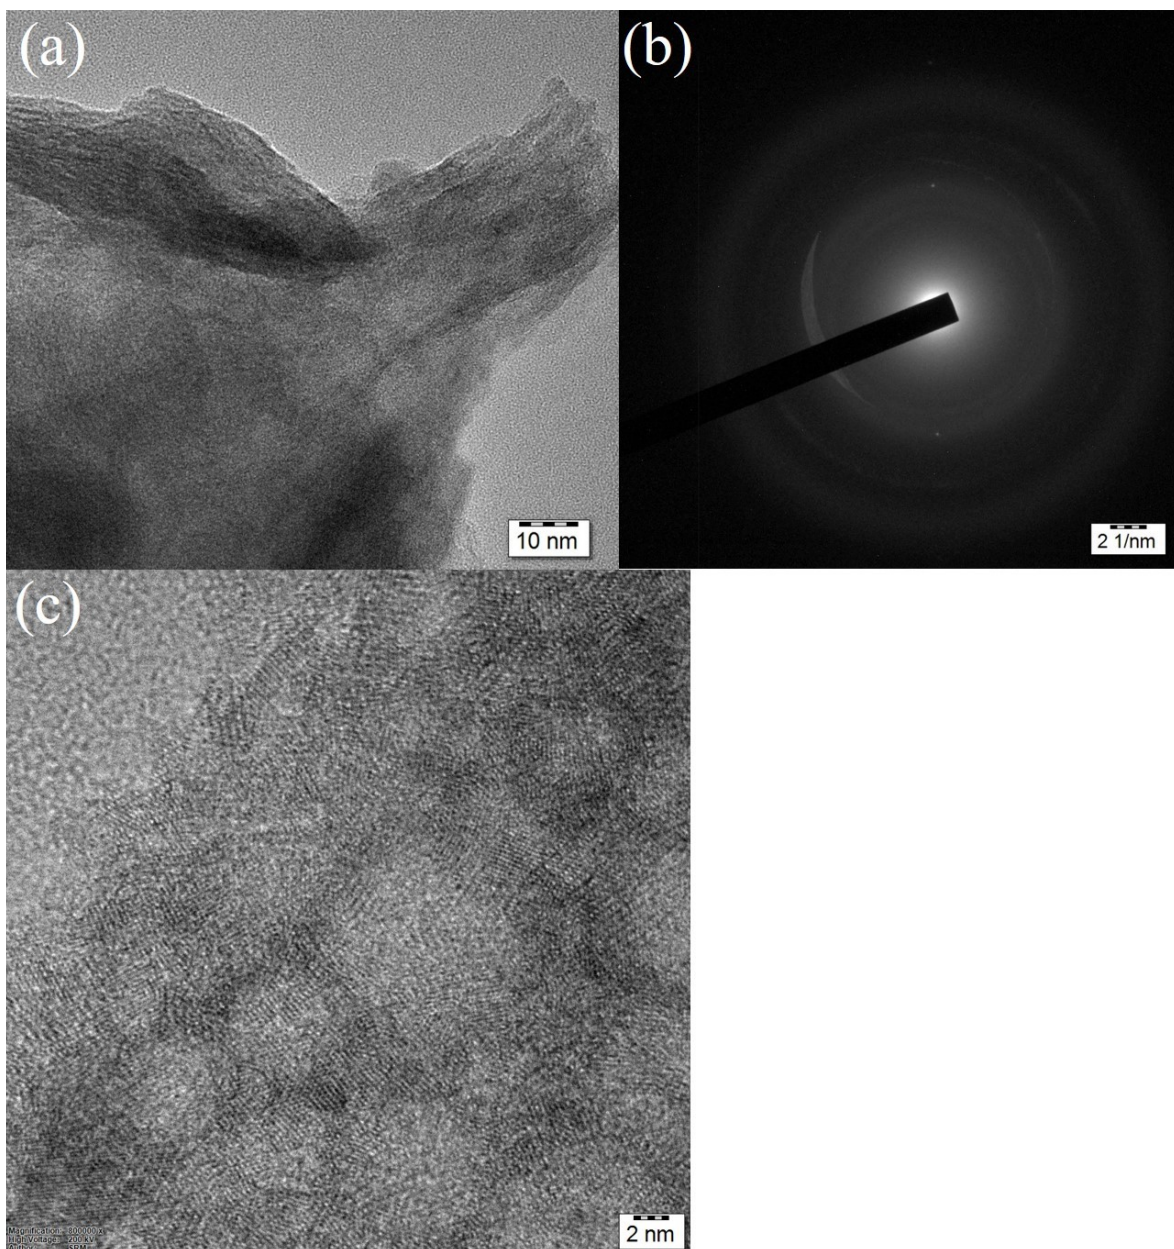

Figure S2. HRTEM images of  $\text{Co}(\text{OH})_2$ .

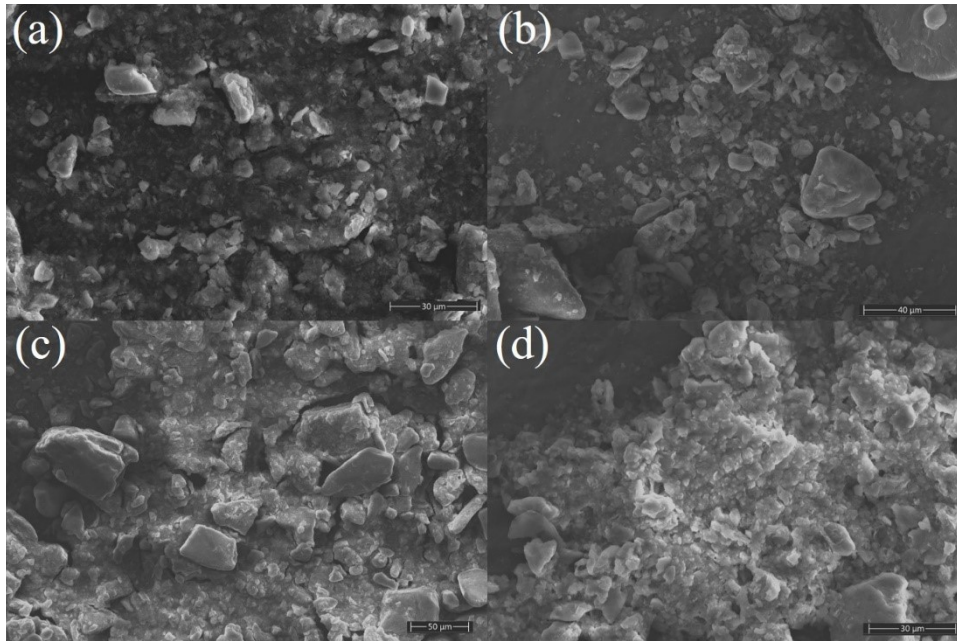

Figure S3. FESEM images of (a)  $\text{Co}(\text{OH})_2$ , (b)  $\text{Ag-Co}(\text{OH})_2\text{-4}$ , (c)  $\text{Ag-Co}(\text{OH})_2\text{-5}$  and (d)  $\text{Ag-Co}(\text{OH})_2\text{-6}$ .

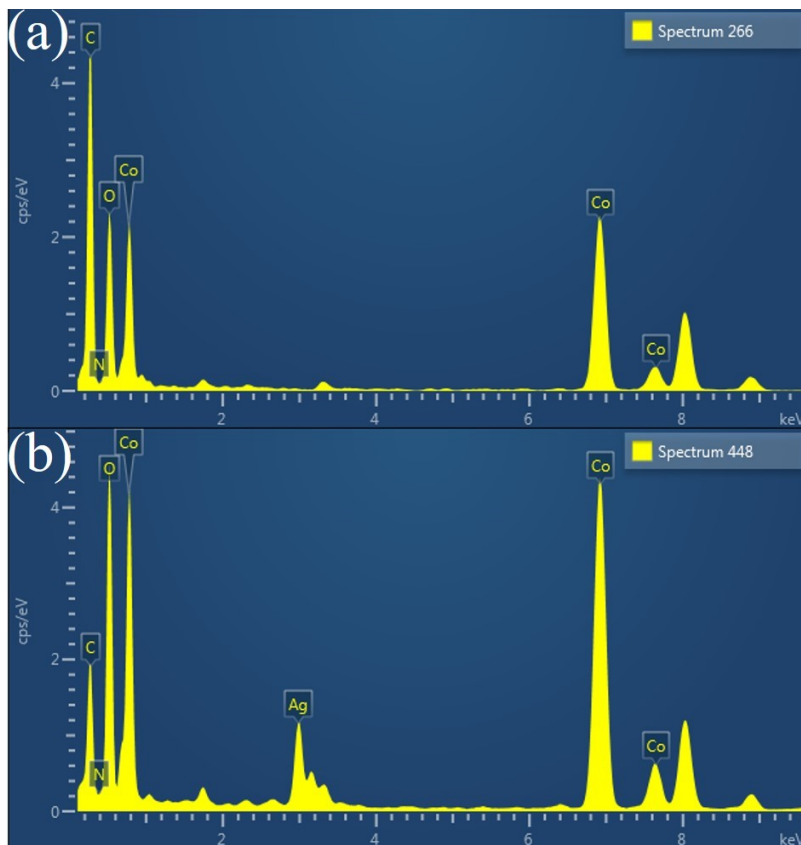

Figure S4. EDX spectra of (a)  $\text{Co}(\text{OH})_2$  and (b)  $\text{Ag-Co}(\text{OH})_2\text{-4}$ .

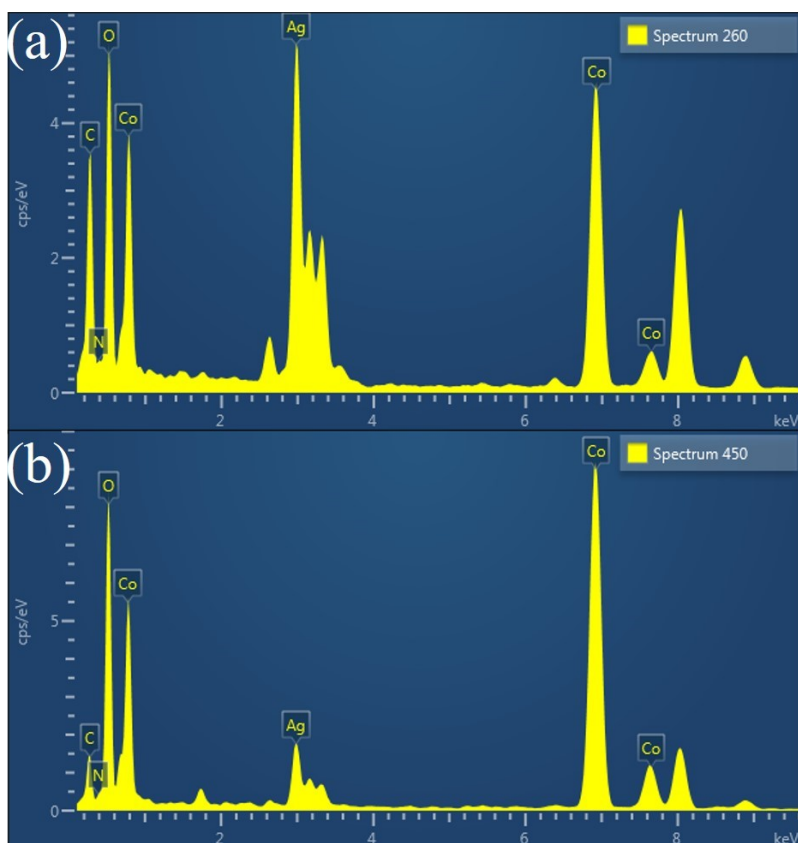

Figure S5. EDX spectra of (a) Ag-Co(OH)<sub>2</sub>-5 and (b) Ag-Co(OH)<sub>2</sub>-6.

Table S1. Elemental percentage obtained from EDX analysis.

| Element | Co(OH) <sub>2</sub> | Ag-Co(OH) <sub>2</sub> -4 | Ag-Co(OH) <sub>2</sub> -5 | Ag-Co(OH) <sub>2</sub> -6 |
|---------|---------------------|---------------------------|---------------------------|---------------------------|
| Co      | 8.52                | 18.42                     | 13.39                     | 25.03                     |
| O       | 21.23               | 47.91                     | 36.9                      | 55.84                     |
| Ag      | 0.00                | 1.95                      | 5.74                      | 2.15                      |
| N       | 0.00                | 1.15                      | 5.13                      | 2.48                      |
| C       | 70.25               | 30.58                     | 38.84                     | 14.5                      |

The observed carbon is from the carbon grid used for the measurement.



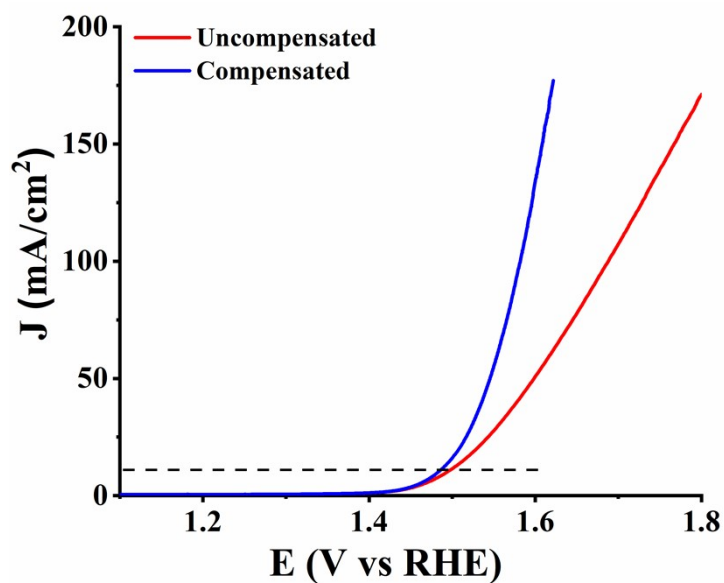

Figure S6. OER polarization curve after iR correction.

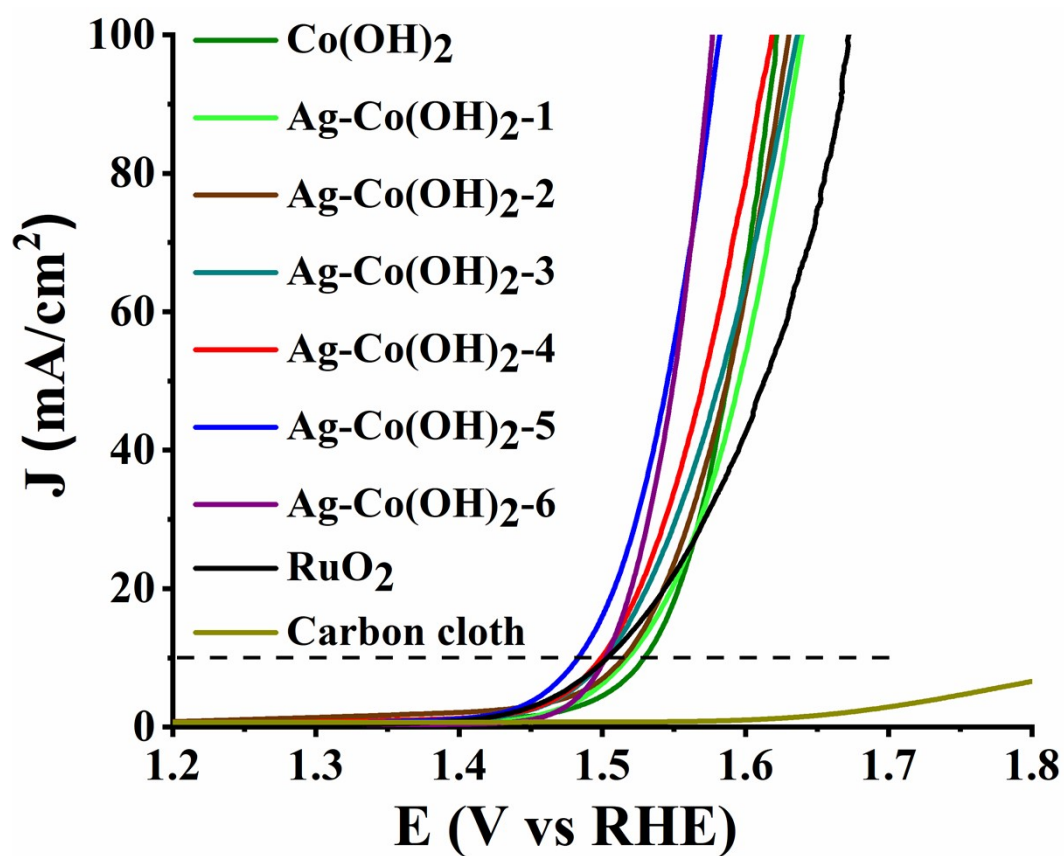

Figure S7. Linear sweep OER polarization curves of  $\text{Co}(\text{OH})_2$  and  $\text{Ag-Co}(\text{OH})_2$  samples.

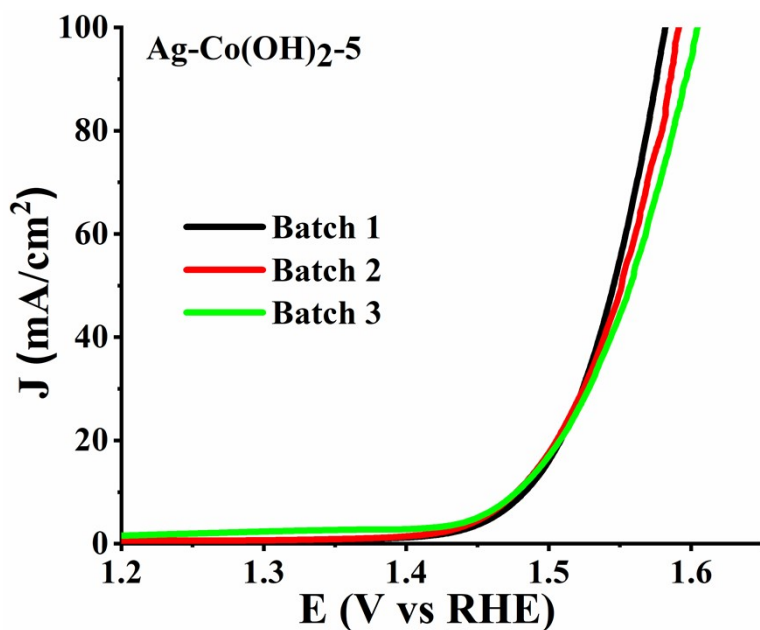

Figure S8. Linear sweep OER polarization curves of  $\text{Ag-Co(OH)}_2\text{-5}$  prepared in three different batches.

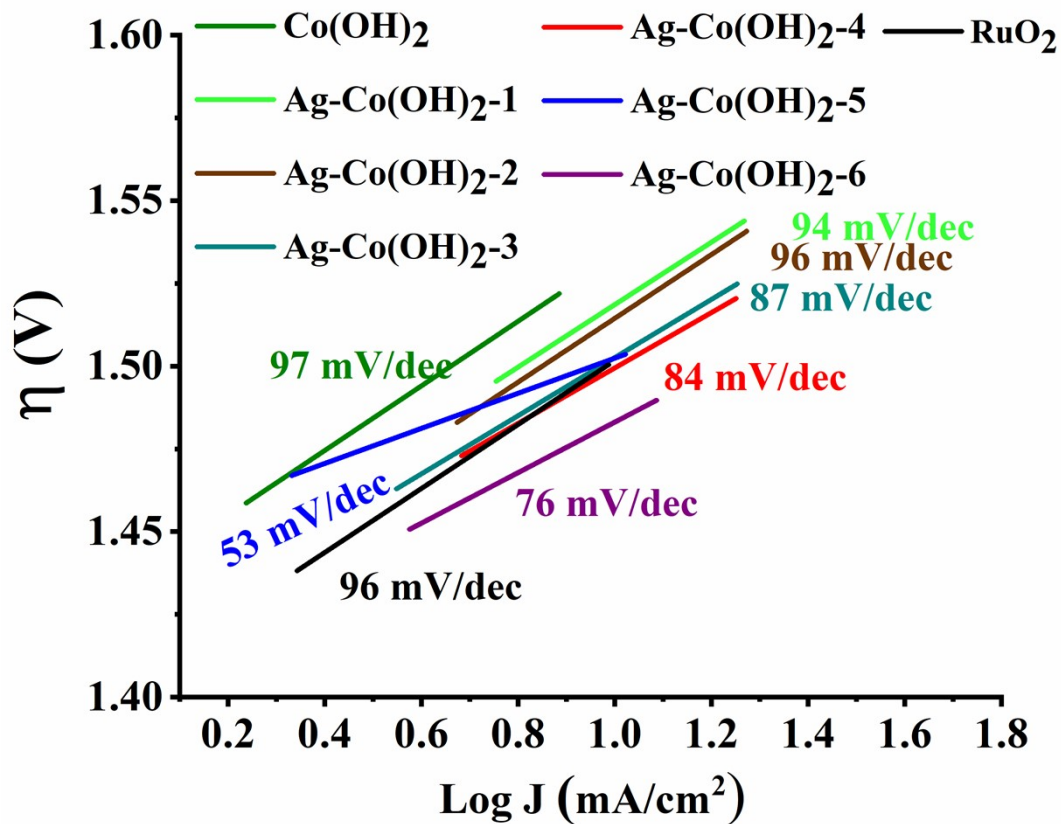

Figure S9. Tafel slope of  $\text{Co(OH)}_2$  and  $\text{Ag-Co(OH)}_2$  samples.

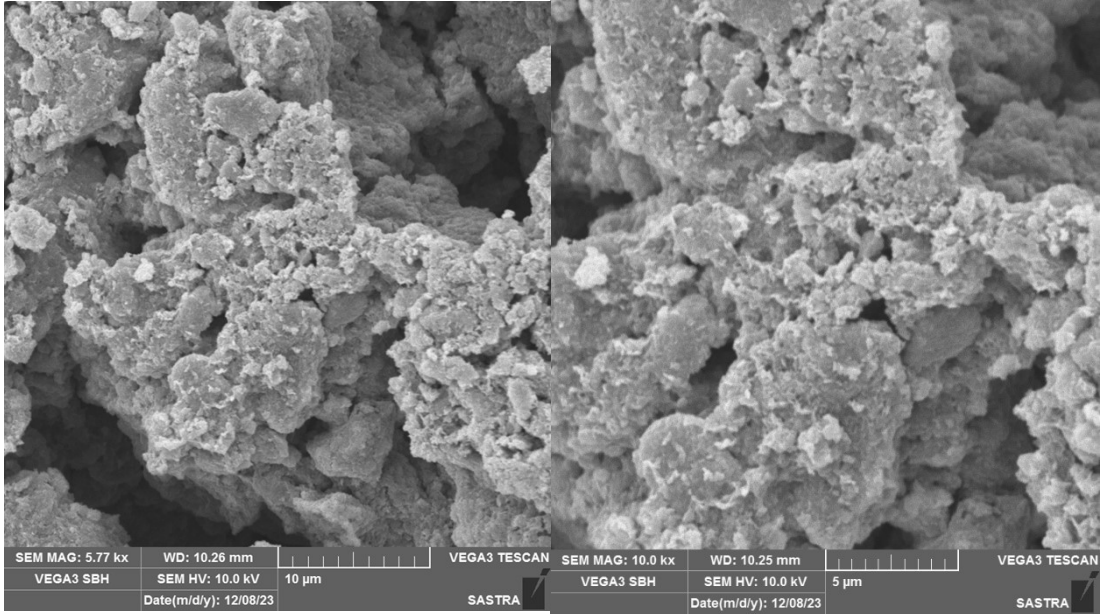



Figure S10. SEM image of Ag-Co(OH)<sub>2</sub>-5 after catalysis.

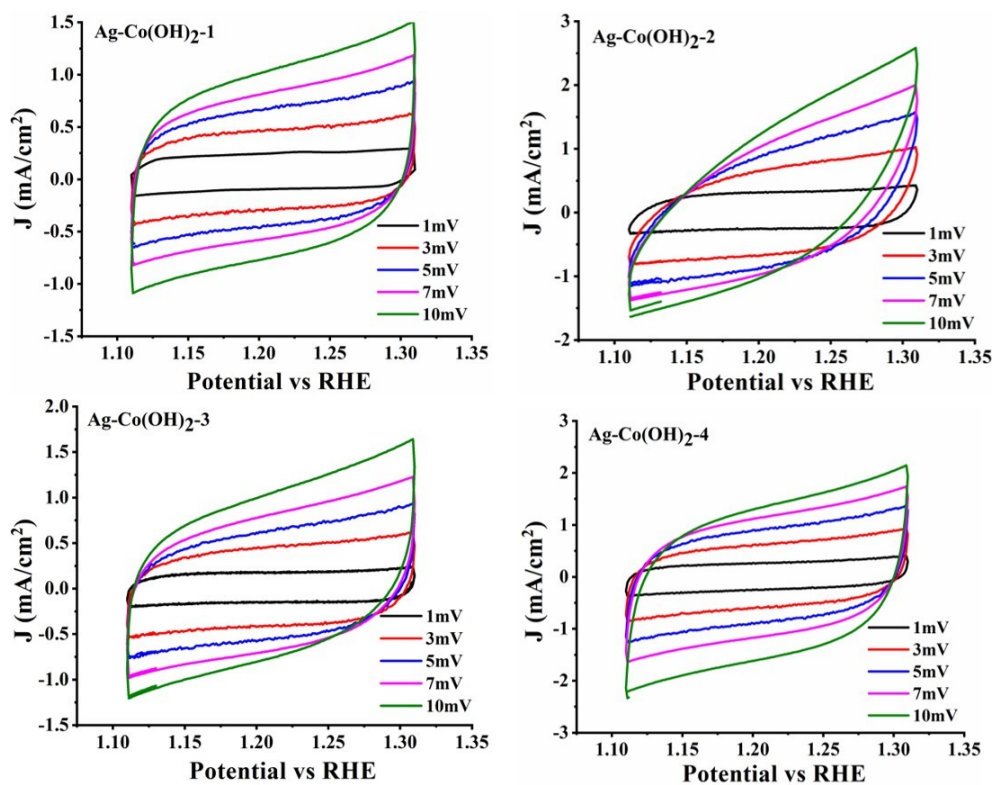

Figure S11. Double layer capacitance and capacitive currents as a functional of scan rate.
